# Supplementary material for: Isoform switching and exon skipping induced by the DNA methylation inhibitor 5-Aza-2′-deoxycytidine
Source: PubMed Central journal article supplement (PMC4835787; doi:10.1038/srep24545), 2016-04-19
Supplement: srep24545-s1.pdf [file srep24545-s1.pdf]

# **Isoform switching and exon skipping induced by the DNA methylation inhibitor 5-aza-2'-deoxycytidine**

Xiao-Lei Ding<sup>1,2</sup>, Xiao-Jing Yang<sup>3</sup>, Gangning Liang<sup>3\*</sup>, Kai Wang<sup>2\*</sup>

<sup>1</sup>Co-Innovation Center for Sustainable Forestry in Southern China, College of Nanjing Forestry University, Nanjing, Jiangsu, China

<sup>2</sup>Zilkha Neurogenetic Institute, University of Southern California, Los Angeles, CA 90033

<sup>3</sup>Department of Urology, Keck School of Medicine, University of Southern California, Los Angeles, CA 90089, USA

\*Correspondence: gliang@usc.edu (GL), kaiwang@usc.edu (KW)

## Supplementary Tables:

**Supplementary Table S1. Detailed annotation results of all differentially expressed genes after 5-Aza-CdR treatment.**

| <b>Day5</b>          | <b>Total</b> | <b>Up</b> | <b>Down</b> |
|----------------------|--------------|-----------|-------------|
| lncRNA               | 150          | 112       | 38          |
| sense intronic       | 6            | 5         | 1           |
| pseudogene           | 101          | 92        | 9           |
| sense overlapping    | 3            | 3         | 0           |
| processed transcript | 16           | 15        | 1           |
| antisense            | 92           | 75        | 17          |
| miRNA                | 2            | 1         | 1           |
| protein coding       | 940          | 882       | 58          |
| misc_RNA             | 5            | 4         | 1           |

| <b>Day9</b>            | <b>Total</b> | <b>Up</b> | <b>Down</b> |
|------------------------|--------------|-----------|-------------|
| polymorphic pseudogene | 1            | 1         | 0           |
| lncRNA                 | 158          | 110       | 48          |
| sense intronic         | 7            | 4         | 3           |
| pseudogene             | 105          | 87        | 18          |
| sense overlapping      | 6            | 4         | 2           |
| processed transcript   | 16           | 15        | 1           |
| antisense              | 82           | 62        | 20          |
| miRNA                  | 3            | 1         | 2           |
| protein coding         | 961          | 856       | 105         |
| misc_RNA               | 5            | 4         | 1           |

| <b>Day13</b>           | <b>Total</b> | <b>Up</b> | <b>Down</b> |
|------------------------|--------------|-----------|-------------|
| polymorphic pseudogene | 1            | 1         | 0           |
| lncRNA                 | 165          | 111       | 54          |
| sense intronic         | 3            | 3         | 0           |
| pseudogene             | 102          | 84        | 18          |
| sense overlapping      | 8            | 5         | 3           |
| processed transcript   | 14           | 12        | 2           |
| antisense              | 72           | 59        | 13          |
| TR_V_gene0             | 1            | 1         | 0           |
| miRNA                  | 1            | 1         | 0           |
| protein coding         | 1022         | 894       | 128         |
| misc_RNA               | 4            | 3         | 1           |

| <b>Day17</b>           | <b>Total</b> | <b>Up</b> | <b>Down</b> |
|------------------------|--------------|-----------|-------------|
| polymorphic pseudogene | 2            | 2         | 0           |
| lncRNA                 | 186          | 127       | 59          |
| sense intronic         | 4            | 2         | 2           |
| pseudogene             | 113          | 95        | 18          |
| snRNA                  | 1            | 1         | 0           |
| sense overlapping      | 6            | 3         | 3           |
| processed transcript   | 16           | 14        | 2           |
| antisense              | 94           | 79        | 15          |
| protein coding         | 1187         | 1044      | 143         |
| miRNA                  | 1            | 1         | 0           |
| misc_RNA               | 2            | 2         | 0           |

## Supplementary Figures

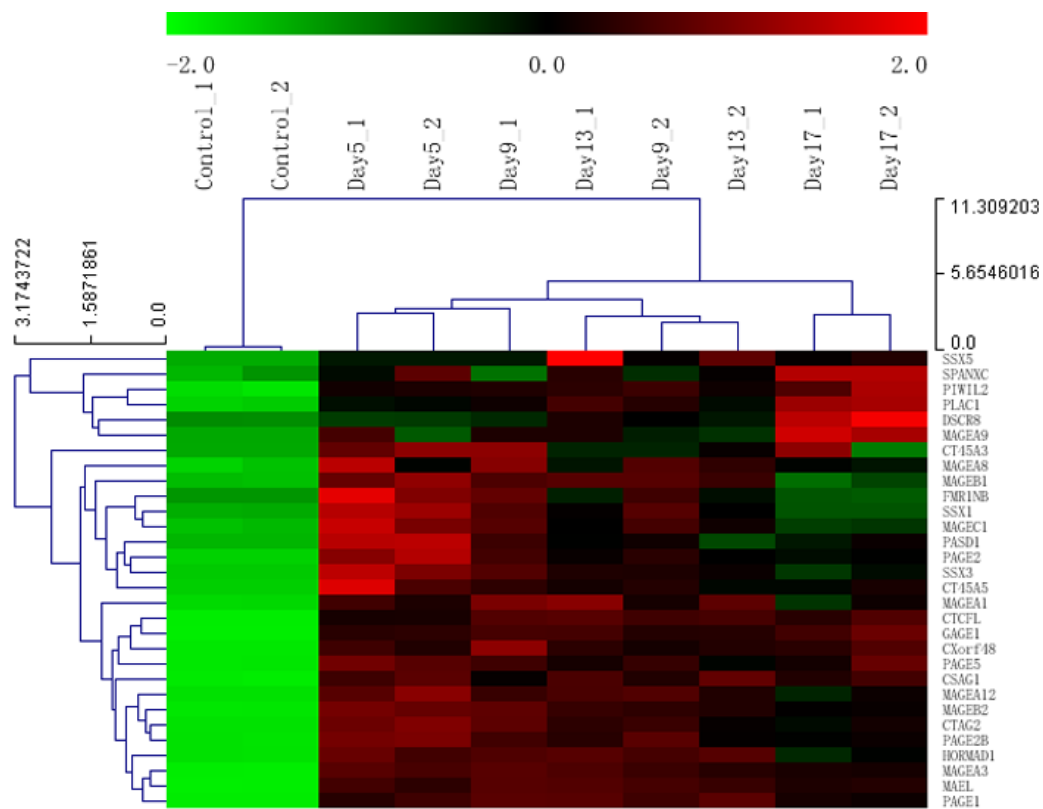

**Supplementary Figure S1. Hierarchical clustering of differentially expressed tumor associated antigens after 5-Aza-CdR treatment.**

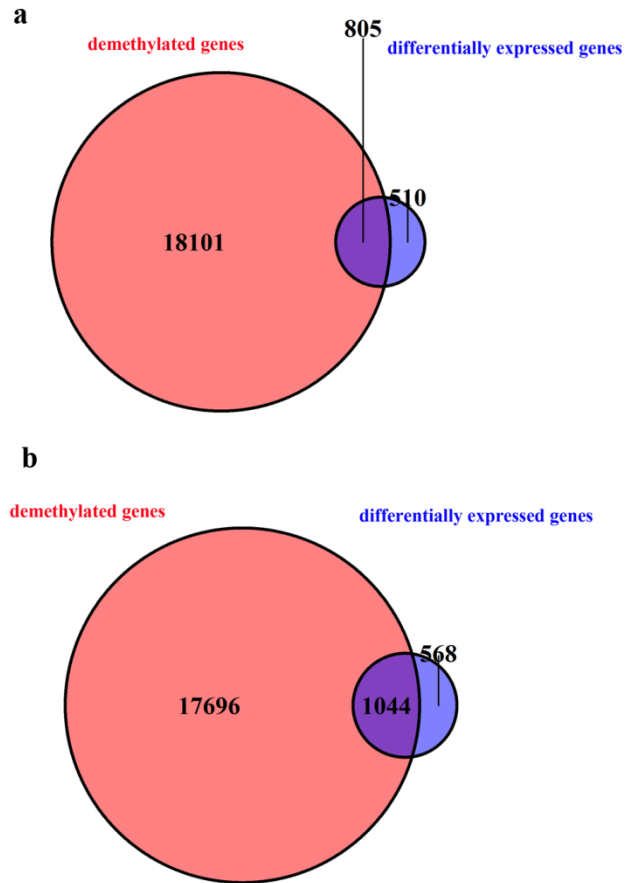

**Supplementary Figure S2. Comparison of whole-genome DNA methylation levels with gene expression changes after 5-Aza-CdR treatment. (a) 5-Aza-CdR treatment for 5 days. (b) 5-Aza-CdR treatment for 17 days.**

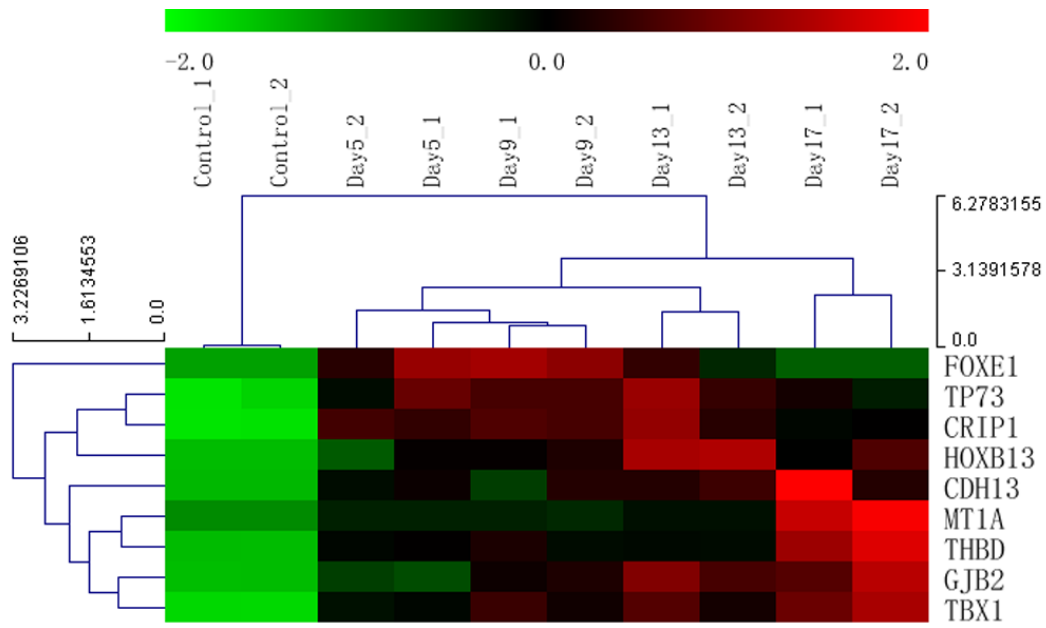

**Supplementary Figure S3. Hierarchical clustering of 9 differentially expressed genes which marked with PcG (*EZH2*) and reported to be hypermethylated in cancer.**
